# Supplementary material for: Predisposition to apoptosis in keratin 8-null liver is related to inactivation of NF-κB and SAPKs but not decreased c-Flip
Source: PubMed Central journal article supplement (PMC3711037; doi:10.1242/bio.20134606), 2013-05-29
Supplement: supp_bio.20134606_bio.20134606-s1.pdf [file supp_bio.20134606_bio.20134606-s1.pdf]

## Supplementary Material

Jongeun Lee et al. doi: 10.1242/bio.20134606

A

| Mouse line         | Dead mice | Total mice | Lethality % |
|--------------------|-----------|------------|-------------|
| FVB/n <sup>†</sup> | 4         | 9          | 44          |
| K8-null            | 7         | 9          | 78          |

<sup>†</sup> Nontransgenic mice

B

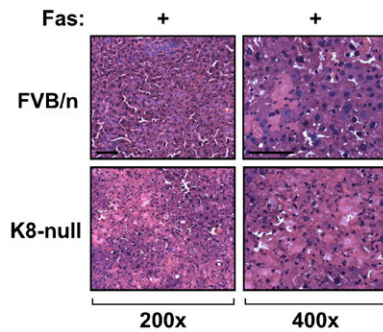

**Fig. S1. Increased susceptibility of K8-null mice after Fas treatment.** Nontransgenic FVB/n or K8-null mice were treated with Fas Ab (0.15 mg/kg body weight) to induce liver injury. (A) Mouse mortality was shown. (B) Histologic analysis. The livers were isolated after 3 hrs, fixed with 10% formalin and stained with hematoxylin/eosin. Note more severe liver damage in K8-null liver as compared with nontransgenic FVB/n liver. Scale bars: 50  $\mu$ m.

A

|                   | Lane | Mouse line | Area      | Percent | Relative density |
|-------------------|------|------------|-----------|---------|------------------|
| c-Flip in Fig. 1B | 1    | FVB/n      | 18098.421 | 21.859  | 1.00             |
|                   | 2    | FVB/n      | 21229.158 | 25.64   | 1.17             |
|                   | 3    | K8-null    | 21062.016 | 25.438  | 1.16             |
|                   | 4    | K8-null    | 22406.572 | 27.062  | 1.24             |
| c-Flip in Fig. 2C | 1    | FVB/n      | 8355.246  | 22.191  | 1.00             |
|                   | 4    | K8-null    | 4777.861  | 12.69   | 0.57             |

B

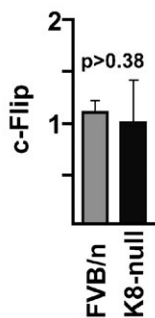

**Fig. S2. c-Flip expression is similar in nontransgenic FVB/n and K8-null livers under basal conditions.** Although the c-Flip band of K8-null (lane 4 in Fig. 2C) was a little bit weaker than that of FVB/n under basal conditions (lane 1 in Fig. 2C), it is likely due to the variation of c-Flip expression in the individual mouse, which is independent of K8 expression. The densitometric quantification of c-Flip expression from 3 mice/strain showed the c-Flip expression in both mice strains was similar under basal conditions. (A) Densitometric quantification of c-Flip expression. (B) Relative amount of c-Flip.
